# Supplementary material
Source: PubMed Central journal article supplement (PMC10089957)
Supplement: NIHMS1855930-supplement-1.pdf [file NIHMS1855930-supplement-1.pdf]

427 **Supplementary Appendix S1: Interview Guide**

428 **GUIDE FOR SEMI-STRUCTURED INTERVIEWS (HEALTHCARE/AGING,**

429 **FIREARMS COMMUNITY)**

430 *PROMPT: Many older adults in this country own firearms. Not much is known about when (or*  
431 *if) they plan for what to do with their firearms should they develop physical or cognitive*  
432 *impairments. The objective of these interviews is to learn more from various stakeholders about*  
433 *how we can best understand how these decisions are made, and what future resources might look*  
434 *like to help older adults make them.*

- 435       • Before we get started, could you please tell me a little more about yourself – your  
436       background, occupation, experience, interests in participating in this research?

437 *In order to understand more about how older adults might think about these issues, and what*  
438 *resources might be beneficial for those making such decisions, I'd like for you to think about any*  
439 *older adult firearm owners that you encounter in your job or volunteer activities. These could be*  
440 *patients, customers, program participants, or older adults you care for, or anyone else who you*  
441 *might have insights about. I'll let you think for a moment about who some of these people might*  
442 *be.*

443 *Driving/Firearm Retirement Comparisons*

- 444       • Thinking about this question, what kinds of interactions do you have with older adults  
445       who own firearms? [probe: as clinician, as firearm retailer/instructor, as someone from  
446       aging organization)
- 447       • What do you think firearms mean to this person/older adults? (Probe: reason for  
448       ownership, usage, meaning)

- 449 • We oftentimes frame decisions about when to stop accessing firearms in parallel with  
450 decision about when to stop driving. Thinking about this, have you heard older adults you  
451 know express any thoughts about how, when, or why they might stop driving? Who do  
452 you think they would want involved in that decision?
- 453 • Now let's think about the firearms: have they thought about how, when, or why older  
454 adults might stop using these firearms? Who do you think they would want involved in  
455 that decision?
- 456 • How might these decisions be similar? Does this person have a similar plan for how they  
457 would come to these decisions? In what ways do you think they are similar?
- 458 • How might these decisions be different? What differences might exist between this  
459 decision to stop driving versus stop using firearms? (as probe: Are there different people  
460 involved?)
- 461 • People sometimes think of the decision to stop driving as "retiring from driving". Does a  
462 similar idea with respect to decisions to stop using firearms make sense to you?
- 463 ○ What would you think of if you saw a reference to "retiring from firearms"? What  
464 are some of your reactions to that idea? Does that make sense to you? Do you  
465 think it would make sense to older adults?
- 466 ○ What are some other ways to talk about this topic that make more sense to you?  
467 How else could you frame this decision to stop using firearms?

468 *Firearm Retirement - Conversations*

- 469 • Our team wants to learn how to help people plan for what they want done with their  
470 firearms to help prevent firearm injuries as they get older, including accidents and  
471 suicide:

- 472 ○ What are your thoughts about how to help people have these conversations?
- 473 ○ How would you go about starting this conversation?
- 474 ○ Who would be the best to initiate this conversation?
- 475 ○ What would be the best way to approach this topic?
- 476 ○ When would these conversations need to happen?
- 477 ○ Who should be involved in these conversations?
- 478 ○ What information would be useful to have in order to help make decisions about
- 479 what to do with firearms? (probes here ? )
- 480 ● What are your thoughts about the idea of older adult firearm owners making plans for
- 481 what they want to have happen to their firearms?

482

483 *Theme: i-PARIHS “context”*

- 484 ● What kinds of factors or experiences do you think influence how older adults think about
- 485 their firearms?
  - 486 ○ Probe 1 – External factors: laws that affect sales or transfer; political views;
  - 487 “cultural norms” about firearm ownership
  - 488 ○ Probe 2 – Internal factors: personal views about wanting or needing a firearm in
  - 489 the home, family traditions, life experiences that highlight firearms
- 490 ● This is a difficult but important topic; if it makes you uncomfortable, we can move on.
- 491 We’ve heard from some older adults that they want to hold onto their firearms so that
- 492 they could potentially use them to kill themselves if their health got to the point where
- 493 they felt hopeless. Have you heard such things from older adults? If so, under what
- 494 circumstances have they described such a scenario?

495 *Theme: i-PARIHS “innovation” / intervention development*

- 496 • Where do you think older adults would go to find information they trust if they wanted to  
497 know more about firearm retirement? (Probe: internet; newsletters from trusted  
498 organizations; healthcare provider; attorney; advanced planning sessions)
- 499 • What kind of materials would be useful for older adults in thinking about firearm  
500 retirement? (Probe: general education; examples of what others have done; “advanced  
501 directive” template; legal advice)

502 *Theme: i-PARIHS “recipient” / intervention dissemination*

- 503 • Who do you think older adults would consider a “credible source” for information about:
  - 504 ○ Driving safety or driving retirement?
  - 505 ○ Firearm safety or firearm retirement?
- 506 • If there was information or an education tool about firearm retirement, who would you  
507 trust to deliver it? (Probe: firearm organization; aging organization; healthcare providers)

508

509

510

511

512

513

514

515

516

517

518 **Supplementary Appendix S2. COREQ Guidelines for Qualitative Research**

519 **COREQ (COnsolidated criteria for REporting Qualitative research)**  
 520 **Checklist**

521

522 Developed from: Tong A, Sainsbury P, Craig J. Consolidated criteria for reporting qualitative research  
 523 (COREQ): a 32-item checklist for interviews and focus groups. *International Journal for Quality in Health*  
 524 *Care*. 2007. Volume 19, Number 6: pp. 349 – 357

525

| Topic                                          | Item No. | Guide Questions/Description                                                                                                                              | Response                                                                                                                           |
|------------------------------------------------|----------|----------------------------------------------------------------------------------------------------------------------------------------------------------|------------------------------------------------------------------------------------------------------------------------------------|
| <b>Domain 1: Research team and reflexivity</b> |          |                                                                                                                                                          |                                                                                                                                    |
| <i>Personal characteristics</i>                |          |                                                                                                                                                          |                                                                                                                                    |
| Interviewer/facilitator                        | 1        | Which author/s conducted the interview or focus group?                                                                                                   | LP/ EP                                                                                                                             |
| Credentials                                    | 2        | What were the researcher’s credentials?<br>E.g. PhD, MD                                                                                                  | PhD/ MA                                                                                                                            |
| Occupation                                     | 3        | What was their occupation at the time of the study?                                                                                                      | Faculty/ Professional Staff                                                                                                        |
| Gender                                         | 4        | Was the researcher male or female?                                                                                                                       | Female/ Male                                                                                                                       |
| Experience and training                        | 5        | What experience or training did the researcher have?                                                                                                     | Training in public health, suicide prevention & qualitative approaches.                                                            |
| <i>Relationship with participants</i>          |          |                                                                                                                                                          |                                                                                                                                    |
| Relationship established                       | 6        | Was a relationship established prior to study commencement?                                                                                              | None                                                                                                                               |
| Participant knowledge of the interviewer       | 7        | What did the participants know about the researcher? e.g. personal goals, reasons for doing the research                                                 | Research objectives and goals, in recruitment email and consent documents which were verbally introduced and sent to participants. |
| Interviewer characteristics                    | 8        | What characteristics were reported about the inter viewer/facilitator?<br>e.g. Bias, assumptions, reasons and interests in the research topic            | Institutions, position, focus areas, and overall research goals.                                                                   |
| <b>Domain 2: Study design</b>                  |          |                                                                                                                                                          |                                                                                                                                    |
| <i>Theoretical framework</i>                   |          |                                                                                                                                                          |                                                                                                                                    |
| Methodological orientation and Theory          | 9        | What methodological orientation was stated to underpin the study? e.g. grounded theory, discourse analysis, ethnography, phenomenology, content analysis | Thematic analysis consistent with Qualitative Description.                                                                         |
| <i>Participant selection</i>                   |          |                                                                                                                                                          |                                                                                                                                    |
| Sampling                                       | 10       | How were participants selected? e.g. purposive, convenience,                                                                                             | Convenience and snowball sampling.                                                                                                 |

|                                        |    |                                                                                   |                                                                                                                                                                                                 |
|----------------------------------------|----|-----------------------------------------------------------------------------------|-------------------------------------------------------------------------------------------------------------------------------------------------------------------------------------------------|
|                                        |    | consecutive, snowball                                                             |                                                                                                                                                                                                 |
| Method of approach                     | 11 | How were participants approached? e.g. face-to-face, telephone, mail, email       | Email recruitment.                                                                                                                                                                              |
| Sample size                            | 12 | How many participants were in the study?                                          | 13                                                                                                                                                                                              |
| Non-participation                      | 13 | How many people refused to participate or dropped out? Reasons?                   | None                                                                                                                                                                                            |
| <i>Setting</i>                         |    |                                                                                   |                                                                                                                                                                                                 |
| Setting of data collection             | 14 | Where was the data collected? e.g. home, clinic, workplace                        | Interviews were done over Zoom, some in clinical settings, some in offices and others at home.                                                                                                  |
| Presence of non-participants           | 15 | Was anyone else present besides the participants and researchers?                 | No.                                                                                                                                                                                             |
| Description of sample                  | 16 | What are the important characteristics of the sample? e.g. demographic data, date | Interviews occurred from November 2020 to May 2021. Demographic variables are outlined in Table 1 in the manuscript.                                                                            |
| <i>Data collection</i>                 |    |                                                                                   |                                                                                                                                                                                                 |
| Interview guide                        | 17 | Were questions, prompts, guides provided by the authors? Was it pilot tested?     | The guides are provided as an appendix. The questions were developed from prior research, but allowed for additional exploration of concepts to emerge, as the interviews were semi-structured. |
| Repeat interviews                      | 18 | Were repeat interviews carried out? If yes, how many?                             | No                                                                                                                                                                                              |
| Audio/visual recording                 | 19 | Did the research use audio or visual recording to collect the data?               | Interviews were recorded with Zoom recording feature and transcribed into deidentified transcripts.                                                                                             |
| Field notes                            | 20 | Were field notes made during and/or after the interview or focus group?           | Structured notes were made after each interview, with group debrief sessions on weekly team calls.                                                                                              |
| Duration                               | 21 | What was the duration of the interviews or focus group?                           | 30-60 minutes.                                                                                                                                                                                  |
| Data saturation                        | 22 | Was data saturation discussed?                                                    | Yes                                                                                                                                                                                             |
| Transcripts returned                   | 23 | Were transcripts returned to participants for comment and/or correction?          | No                                                                                                                                                                                              |
| <b>Domain 3: analysis and findings</b> |    |                                                                                   |                                                                                                                                                                                                 |

|                                |    |                                                                                                                                    |                                                                                                                  |
|--------------------------------|----|------------------------------------------------------------------------------------------------------------------------------------|------------------------------------------------------------------------------------------------------------------|
| <i>Data analysis</i>           |    |                                                                                                                                    |                                                                                                                  |
| Number of data coders          | 24 | How many data coders coded the data?                                                                                               | Four                                                                                                             |
| Description of the coding tree | 25 | Did authors provide a description of the coding tree?                                                                              | Yes                                                                                                              |
| Derivation of themes           | 26 | Were themes identified in advance or derived from the data?                                                                        | Both                                                                                                             |
| Software                       | 27 | What software, if applicable, was used to manage the data?                                                                         | Dedoose                                                                                                          |
| Participant checking           | 28 | Did participants provide feedback on the findings?                                                                                 | No, but later interviews were able to comment on early themes for validation and expansion of emergent concepts. |
| <i>Reporting</i>               |    |                                                                                                                                    |                                                                                                                  |
| Quotations presented           | 29 | Were participant quotations presented to illustrate the themes/findings?<br>Was each quotation identified? e.g. participant number | Yes                                                                                                              |
| Data and findings consistent   | 30 | Was there consistency between the data presented and the findings?                                                                 | Yes                                                                                                              |
| Clarity of major themes        | 31 | Were major themes clearly presented in the findings?                                                                               | Yes                                                                                                              |
| Clarity of minor themes        | 32 | Is there a description of diverse cases or discussion of minor themes?                                                             | Yes                                                                                                              |

## **Supplementary Appendix S3: Structured Debrief Form**

### **Interview Debriefing Form**

*This form can be used to guide a debriefing discussion following the conclusion of an interview.  
The conversation could be recorded.*

**Interview:**

**Context:**

**Date interview conducted:**

**Today's date:**

- 1. What were the main issues or themes that struck you during this interview?**
- 2. What information seemed consistent with what you have learned from other focus groups, interviews or data sources?**
- 3. What information seemed to contradict what you have learned from other focus groups, interviews or data sources?**
- 4. What new questions emerged for you during this interview that you might want to explore with other participants, key informants/ data sources?**
- 5. Did the interview seem to flow well? In what areas? How could this be improved?**
- 6. What else is important to capture about this interview?**

**Other Notes:**



#### **Supplementary Appendix S4. Additional Details on Methods**

The study team included physicians and researchers experienced in firearm safety, aging, veteran health, driving, and injury prevention. Interviewers (one female, one male) had advanced credentials (LP: PhD, MPH, MHA; EP: MA) in conducting public health research. Introduction to the researchers and their areas of expertise was reviewed with participants prior to beginning the interview. Participants were recruited through social media, professional networks representing health care providers who care for older adults, personal networks and institutional email listservs. Snowball sampling allowed for the recruitment of eligible providers from interviewee personal and professional networks. Participants were introduced to the study goals and objectives in a recruitment email and consent documents which were verbally introduced and e-mailed to all participants prior to interviews.

The interview guide was formed based on prior research and allowed for additional exploration of emergent concepts. Interviews were 30-60 minutes in length and conducted over Zoom sessions, during which verbal consent was obtained prior to initiating the recording feature. Team-based discussion was facilitated by a structured debriefing template (Supplementary Appendix S4) and occurred at weekly team meetings. Recorded sessions were sent to a professional transcription service, where interviews were transcribed into deidentified documents. The transcription service indicated areas of low confidence in transcription, all of which were cross-checked with the recording by a member of the research team (EP), to verify accuracy. Data analysis followed an inductive/deductive approach to thematic analysis; we coded for a priori defined concepts and for newly emergent themes.
