# Supplementary material
Source: PubMed Central journal article supplement (PMC10089957)
Supplement: NIHMS1855930-supplement-supinfo.pdf [file NIHMS1855930-supplement-supinfo.pdf]

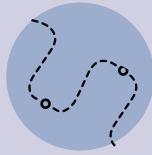

**Lack of established pathways**

Triaging firearm safety concerns is challenging due to the lack of established pathways. Variation in state transfer laws make this more complex to navigate.

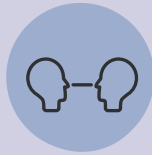

**Discordance between care partner and older adult**

Differing beliefs and perspectives as well as contentious relationships can inhibit productive firearm safety planning.

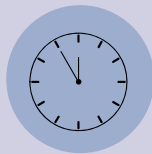

**Competing priorities**

Lack of time, institutional prioritization, remuneration and competing health problems make finding time for firearm safety planning difficult.

**Firearm Safety Counseling for Older Adults in Clinical Settings**

PROVIDER PERSPECTIVES

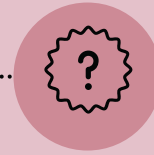

**Addressing firearm values**

Personal values and reasons for ownership should be assessed prior to initiating the conversation.

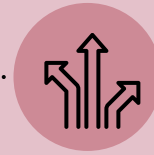

**Heterogeneity**

Every firearm owner is unique. Expressing understanding and valuing the individual's input will help facilitate productive long-term planning.

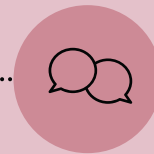

**Peer-based models**

Peer-facilitated models that have been effective for other complex topics such as advance care planning might be useful for firearm safety planning.
